# Supplementary material
Source: MDPI journal article supplement (https://www.mdpi.com/2072-4292/11/4/458)
Supplement: s1 [file s1]

Supplementary material

## Spectral Heterogeneity Predicts Local-scale Gamma and Beta Diversity of Mesic Grasslands

H. Wayne Polley, Chenghai Yang, Brian J. Wilsey and Philip A. Fay

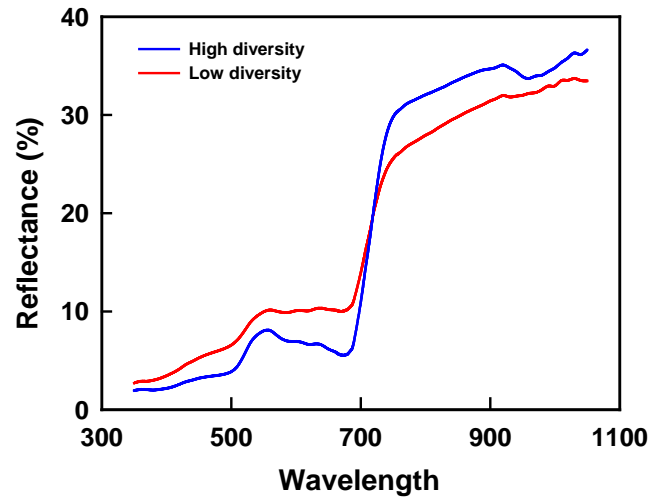

fig. S1

**Figure S1.** Mean values of reflectance as a function of wavelength for 7-m diameter patches that differed in species diversity. Reflectance per waveband was averaged across patches with gamma ( $\gamma$ ) diversity  $< 6.0$  and  $> 6.0$  (low and high diversity, respectively;  $n = 20, 26$ ).
